# Supplementary material for: The Impact of the C-Terminal Region on the Interaction of Topoisomerase II Alpha with Mitotic Chromatin
Source: PubMed Central journal article supplement (PMC6429393; doi:10.3390/ijms20051238), 2019-03-12
Supplement: ijms-20-01238-s001.pdf [file ijms-20-01238-s001.pdf]

Suppl Table 1: Human TOP2A expression constructs used/ generated in this study.

| Plasmid name                        | Starting plasmid | Epitope tag  | Human TOP2A residues  | TOP2A residues mutated                                                                                | TOP2A residues deleted | Fusion protein | Theor. MW fusion protein (KDa.) | Novel junction sequence(s)                                                                                                                                                                                   |
|-------------------------------------|------------------|--------------|-----------------------|-------------------------------------------------------------------------------------------------------|------------------------|----------------|---------------------------------|--------------------------------------------------------------------------------------------------------------------------------------------------------------------------------------------------------------|
| <b>1. Flag-tagged series</b>        |                  |              |                       |                                                                                                       |                        |                |                                 |                                                                                                                                                                                                              |
| pFlag: TOP2A (FT) (Farr et al 2014) | pcDNA3           | N-ter 3xFlag | 1-1531                | WT                                                                                                    |                        | -              | 178                             | FLAG-(novel)-TOP2A<br>MDYKDHDGDY<br>KDKDIDYKDDD<br>GILQISTVTMEVS<br>PLQP...                                                                                                                                  |
| pFT-11xKR                           | pFlag: TOP2A     |              |                       | K→R<br>1141,<br>1204,<br>1228,<br>1240,<br>1264,<br>1267,<br>1370,<br>1422,<br>1442,<br>1492,<br>1520 |                        |                | 178                             |                                                                                                                                                                                                              |
| pFT-4xKR                            | pFlag: TOP2A     |              |                       | K→R<br>1228<br>1240<br>1264<br>1267                                                                   |                        |                | 178                             |                                                                                                                                                                                                              |
| pFT-K1240R                          | pFlag: TOP2A     |              |                       | K→R<br>1240                                                                                           |                        |                | 178                             |                                                                                                                                                                                                              |
| pFT-K662R                           | pFlag: TOP2A     |              |                       | K→R<br>662                                                                                            |                        |                | 178                             |                                                                                                                                                                                                              |
| pFST                                | pFlag: TOP2A     |              |                       | WT                                                                                                    |                        | SUMO2          | 189                             | FLAG-(novel)-SUMO2-(novel)-TOP2A<br>MDYKDHDGDY<br>KDHDIDYKDDD<br>GILQIEKPKEGVK<br>ENNDHINLKVA<br>QDGSVVQFKIKR<br>HTPLSKLMKAYC<br>ERQGLSMRQIRF<br>RFDGQPINETDT<br>PALLEMEDEDTI<br>DVFQQQTISTVT<br>MEVSPLQP... |
| pFTΔ2                               | pFlag: TOP2A     |              | 1-1173::14<br>47-1531 | -                                                                                                     | 1174-1446              | -              | 148                             | TOP2AΔ<br>DLAT :: LNSGV                                                                                                                                                                                      |
| pFTΔ3                               | pFlag: TOP2A     |              | 1-1320::14<br>47-1531 | -                                                                                                     | 1321-1446              | -              | 165                             | TOP2AΔ<br>PRRA :: LNSGV                                                                                                                                                                                      |
| pFTΔ5                               | pFlag: TOP2A     |              | 1-1211::14<br>47-1531 | -                                                                                                     | 1212-1446              | -              | 152                             | TOP2AΔ<br>QMAEV :: LNSGV                                                                                                                                                                                     |

|                             |                    |          |                                                                                                |       |   |    |                                                                     |
|-----------------------------|--------------------|----------|------------------------------------------------------------------------------------------------|-------|---|----|---------------------------------------------------------------------|
| pFlag-<br>CTR-WT            | pFlag:<br>TOP2A    | 971-1531 | WT CTR                                                                                         | 1-970 | - | 67 | FLAG-(novel)-<br>TOP2A<br>MDYKDHDGDY<br>KDKDIDYKDDD<br>GLQISKMTEEKL |
| pFT-<br>CTR-<br>11xKR       | pFlag-<br>CTR-WT   | 971-1531 | K→R                                                                                            | 1-970 |   | 67 |                                                                     |
|                             |                    |          | 1141,<br>1204,<br>1228,<br>1240,<br>1264,<br>1267,<br>1370,<br>1422,<br>1442,<br>1492,<br>1520 |       |   |    |                                                                     |
| pFT-<br>CTR-<br>4xKR        | pFlag-<br>CTR-WT   |          | K→R                                                                                            |       |   | 67 |                                                                     |
|                             |                    |          | 1228<br>1240<br>1264<br>1267                                                                   |       |   |    |                                                                     |
| pFT-<br>CTR-<br>3xKR        | pFlag-<br>CTR-WT   |          | K→R                                                                                            |       |   | 67 |                                                                     |
|                             |                    |          | 1240<br>1264<br>1267                                                                           |       |   |    |                                                                     |
| pFT-<br>CTR-<br>2xKR        | pFlag-<br>CTR-WT   |          | K→R                                                                                            |       |   | 67 |                                                                     |
|                             |                    |          | 1228<br>1240                                                                                   |       |   |    |                                                                     |
| pFT-<br>CTR-<br>1xKR        | pFlag-<br>CTR-WT   |          | K→R                                                                                            |       |   | 67 |                                                                     |
|                             |                    |          | 1240                                                                                           |       |   |    |                                                                     |
| pFT-<br>CTR-<br>T1244A      | pFlag-<br>CTR-WT   |          | T→A                                                                                            |       |   | 67 |                                                                     |
|                             |                    |          | 1244                                                                                           |       |   |    |                                                                     |
| pFT-<br>CTR-<br>S1247A      | p3xFlag-<br>CTR-WT |          | S→A                                                                                            |       |   | 67 |                                                                     |
|                             |                    |          | 1247                                                                                           |       |   |    |                                                                     |
| pFT-<br>CTR-<br>TA/SA<br>dm | pFlag-<br>CTR-WT   |          | T→A                                                                                            |       |   | 67 |                                                                     |
|                             |                    |          | 1244<br>S→A<br>1247                                                                            |       |   |    |                                                                     |
| pFT-<br>CTR-<br>TD/SD<br>dm | pFlag-<br>CTR-WT   |          | T→D                                                                                            |       |   | 67 |                                                                     |
|                             |                    |          | 1244<br>S→D<br>1247                                                                            |       |   |    |                                                                     |

## 2. GFP-tagged series

|                        |                |               |        |      |  |     |                                                                                                          |
|------------------------|----------------|---------------|--------|------|--|-----|----------------------------------------------------------------------------------------------------------|
| pGFP:<br>TOP2A<br>[43] | pEGFP-<br>C1   | N-ter<br>EGFP | 1-1531 | WT   |  | 207 | GFP-(novel)-<br>TOP2A<br>MVSKGEEL....G<br>MDELYKSGLRSR<br>SRSIVLERFLSPFT<br>TVTMEVSPLQPV<br>....DEDDL*F* |
| pGT-<br>K1240R         | pGFP:<br>TOP2A |               |        | K→R  |  | 207 |                                                                                                          |
|                        |                |               |        | 1240 |  |     |                                                                                                          |
| pGT-<br>S1213A         | pGFP:<br>TOP2A |               |        | S→A  |  | 207 |                                                                                                          |
|                        |                |               |        | 1213 |  |     |                                                                                                          |
| pGT-<br>S12147A        | pGFP:<br>TOP2A |               |        | S→A  |  | 207 |                                                                                                          |
|                        |                |               |        | 1247 |  |     |                                                                                                          |

|            |            |             |       |     |     |                                                                                                                                                   |
|------------|------------|-------------|-------|-----|-----|---------------------------------------------------------------------------------------------------------------------------------------------------|
| pGT-S1213D | pGFP:TOP2A | S→D<br>1213 |       |     | 207 |                                                                                                                                                   |
| pGT-K662R  | pGFP:TOP2A | K→R<br>662  |       |     | 207 |                                                                                                                                                   |
| pGT:SUMO2  | pGFP:TOP2A | WT          | SUMO2 | 218 |     | GFP-(novel)-TOP2A-(novel)-SUMO2<br>MVSKGEEL....G<br>MDELYKSGLRSR<br>SRSIVLERFLSPFT<br>TVTMEVSPLQPV<br>....DEDDLFLSDE<br>KPKEGVKTENN<br>D....QQQT* |
| pG:SUMO2:T | pGFP:TOP2A | WT          | SUMO2 | 218 |     | GFP-SUMO2-(novel)-TOP2A<br>MVSKGEEL....G<br>MDELYKADEKP<br>KEGVKTENNNDH<br>....DVFQQTISTVT<br>MEVSPLQ....DED<br>DLF*                              |

In all constructs the selection cassette present confers puromycin-resistance.
